# Supplementary material for: CHIR99021, trough GSK-3β Targeting, Reduces Epithelioid Sarcoma Cell Proliferation by Activating Mitotic Catastrophe and Autophagy
Source: MDPI journal article supplement (doi:10.3390/ijms222011147), 2021-10-15
Supplement: s1 [file s1]

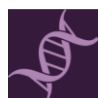

Supplementary material

# CHIR99021, through GSK-3 $\beta$ targeting, reduces Epithelioid Sarcoma cell proliferation by activating mitotic catastrophe and autophagy

Sabino Russi <sup>1</sup>, Alessandro Sgambato <sup>1</sup>, Anna Maria Bochicchio <sup>1</sup>, Pietro Zoppoli <sup>1</sup>, Michele Aieta <sup>1</sup>, Alba Maria Lucia Capobianco <sup>1</sup>, Vitalba Ruggieri <sup>1,2</sup>, Emanuela Zifarone <sup>1</sup>, Geppino Falco <sup>3,4\*</sup> and Simona Laurino <sup>1</sup>

<sup>1</sup> IRCCS CROB – Referral Cancer Center of Basilicata, Rionero in Vulture (PZ), Italy;

<sup>2</sup> UOC Clinical Pathology, Altamura Hospital, Altamura (BA), Italy

<sup>3</sup> Department of Biology, University of Naples Federico II, Naples, Italy;

<sup>4</sup> Biogem - Istituto di Biologia e Genetica Molecolare, Ariano Irpino (AV), Italy;

\* Correspondence: geppino.falco@unina.it;

## 1.1 Supplementary Figures

**Citation:** Russi, S.; Sgambato, A.; Bochicchio, A.M.; Zoppoli, P.; Aieta, M.; Capobianco, A.M.L.; Ruggieri, V.; Zifarone, E.; Falco, G.; Laurino, S. CHIR99021, through GSK-3 $\beta$  Targeting, Reduces Epithelioid Sarcoma Cell Proliferation by Activating Mitotic Catastrophe and Autophagy. *Int. J. Mol. Sci.* **2021**, *22*, 11147. <https://doi.org/10.3390/ijms222011147>

Academic Editor: Cecilia Garofalo

Received: 22 September 2021

Accepted: 12 October 2021

Published: 15 October 2021

**Publisher's Note:** MDPI stays neutral with regard to jurisdictional claims in published maps and institutional affiliations.

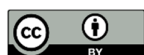

**Copyright:** © 2021 by the authors. Licensee MDPI, Basel, Switzerland. This article is an open access article distributed under the terms and conditions of the Creative Commons Attribution (CC BY) license (<https://creativecommons.org/licenses/by/4.0/>).

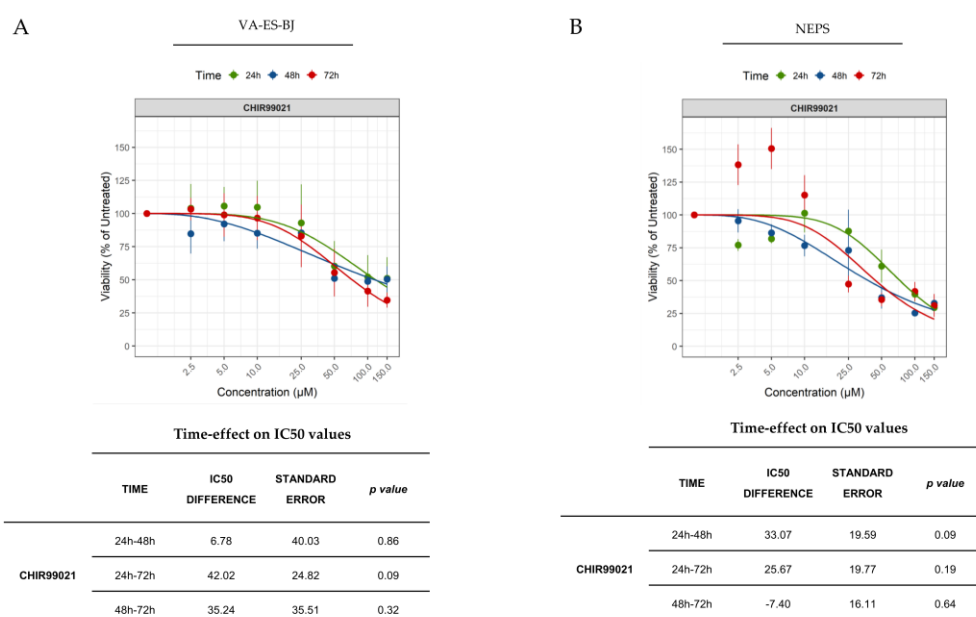

**Figure S1.** Effect of CHIR99021 on ES cells viability assessed by MTS, at 24, 48 and 72h using 7 different concentrations ranging from 2.5  $\mu$ M to 150  $\mu$ M. (A) VA-ES-BJ and (B) NEPS cell viability was expressed as the percentage (%) of untreated cells (DMSO). The data were shown as mean and standard error of 3 independent experiments. Dose-response curves were used to estimate IC50 values of drug. Tables report the time-effect on IC50 values for each cell line.

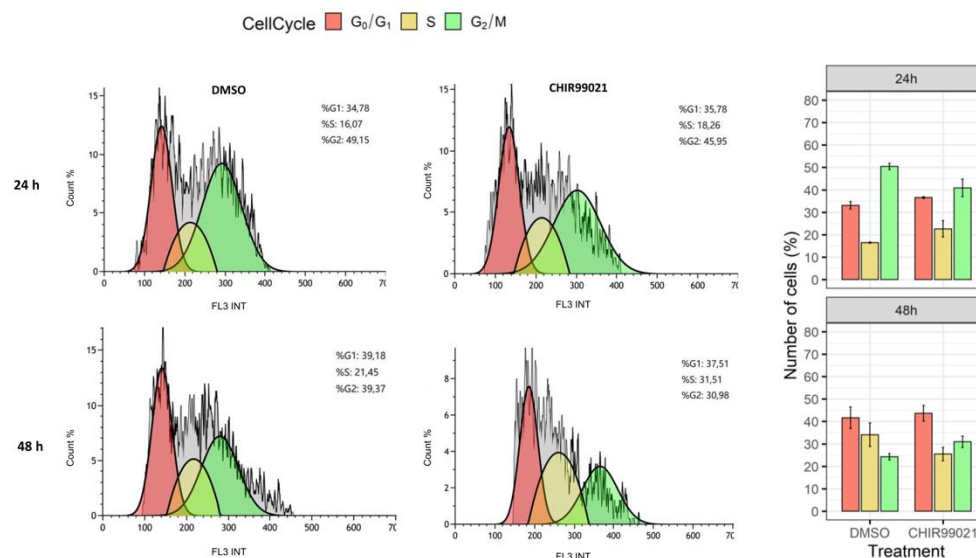

**Figure S2.** Effect of CHIR99021 on the cell cycle distribution of dermal fibroblast cell line. Representative plots of DNA content distribution of cell cycle phases of Primary Dermal Fibroblast; Normal, Human, Adult (HDFa) cell treated with CHIR99021 100  $\mu$ M for 24 and 48h. Histogram represents the percentage of cell number in the G<sub>0</sub>/G<sub>1</sub>, S, and G<sub>2</sub>/M phases after treatment, a mean of  $2 \times 10^3$  events were acquired. The values are representative of means  $\pm$  SE of 3 separate experiments. Differences were evaluated using paired t test.
